# Supplementary material for: Genomic analysis of an Argentinean isolate of Spodoptera frugiperda granulovirus reveals that various baculoviruses code for Lef-7 proteins with three F-box domains
Source: PLOS journal article supplement (doi:10.1371/journal.pone.0202598), 2018-08-22
Supplement: S9 (10.1371/journal.pone.0202598.s009) [file journal.pone.0202598.s009]

S3 Fig. Multiple alignment of ORF026 homologs.

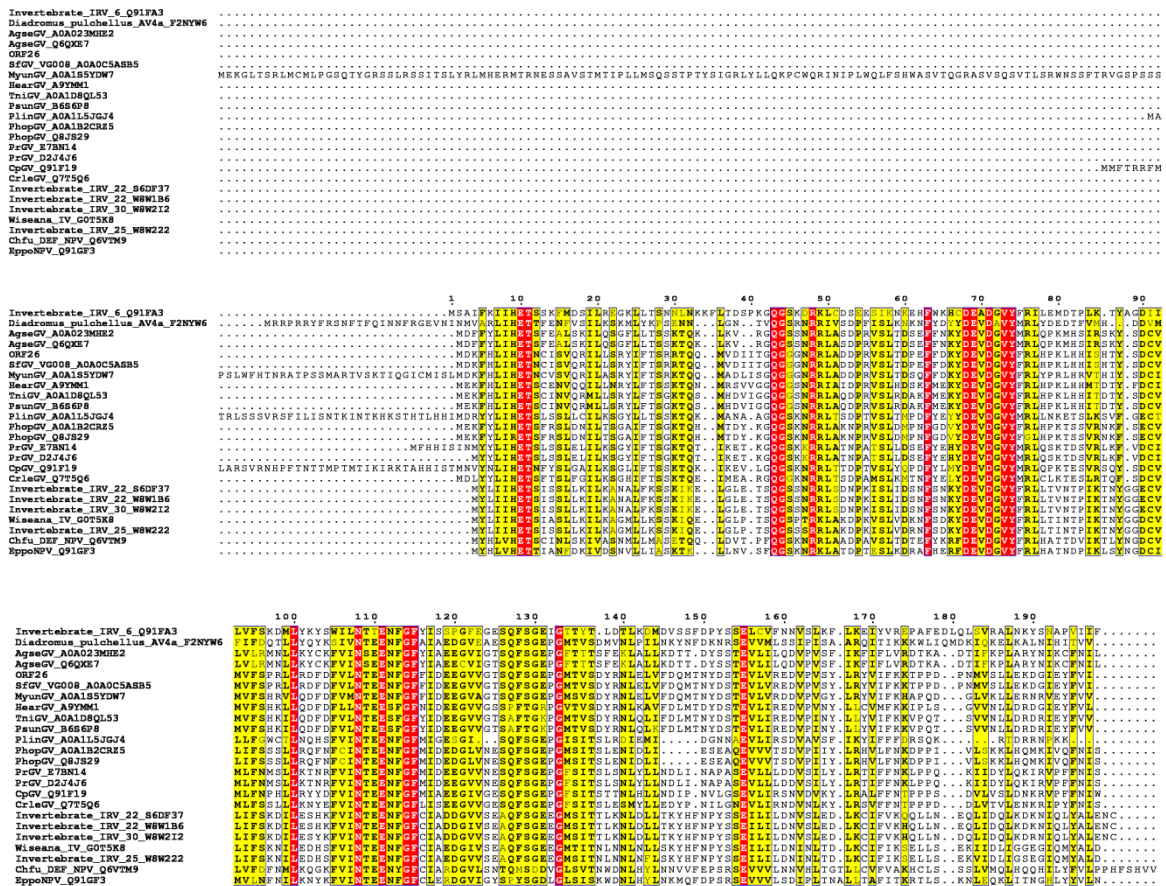

Multiple alignment (MUSCLE) of SfGV-ARG ORF026 with its homologs in baculovirus, iridovirus and ascovirus. Uniprot IDs are indicated.
